# Supplementary material for: Nanog induces suppression of senescence through downregulation of p27KIP1 expression
Source: Oxford University Press journal article supplement (doi:10.1242/jcs.167932), 2016-01-22
Supplement: jcs167932supp.pdf [file jcs167932supp.pdf]

## **SUPPLEMENTARY TABLES:**

**Table S1: Primers used for RT-PCR** (this table is related to Figure S2).

| <b>Genes</b>            | <b>Primer sequence (5'-3')</b>                             |
|-------------------------|------------------------------------------------------------|
| p27 <sup>KIP1</sup>     | F: TCTCTTCGGCCCGGTCAAT<br>R: GGGGCTTATGATTCTGAAAGTCG       |
| p53                     | F: TGAAACGCCGACCTATCCTTA<br>R: GGCACAAACACGAACCTCAA        |
| p21 <sup>CIP/WAF</sup>  | F: CTGAGGATGAACAGTAACAACCG<br>R: CTGGGAAGATAGAGCGAAGCC     |
| p16 <sup>INK4a</sup>    | F: GCTGCAGACAGACTGGCCA<br>R: GTCCTCGCAGTTCGAATCTG          |
| FGF receptor 1 (FGF-R1) | F: GGTGCTTCATCTACGGAATGTC<br>R: TGATGGGAGAGTCCGATAGAGT     |
| GAPDH                   | F: ACGACCCCTTCATTGACCTCAACT<br>R: ATATTTCTCGTGGTTCACACCCAT |

**Table S2: Primer pairs used for ChIP analysis** (this table is related to Figure 3).

| <b>Primers</b> | <b>Primer Sequence (5'-3')</b>                         |
|----------------|--------------------------------------------------------|
| D1             | F: CTTCTCATCCCAAGTCCACA<br>R: AGACTACCTGGGTAGGTAATTTGG |
| D2             | F: GGCTGGAGTCATCAGAAAGC<br>R: GGCCATAAGACAAAGGAGGA     |
| P1             | F: TGAAGAGATTGGGGGTATGG<br>R: AGCCCCAACTGTGTCTGAAG     |
| P2             | F: CAGTTGGGGCTCATAATTGC<br>R: AGAACACCTGCGTGGAAGAT     |
| Dc             | F: AGACACTGAAAATTATACTAA<br>R: GTAACAATAATTGGCATCTTT   |

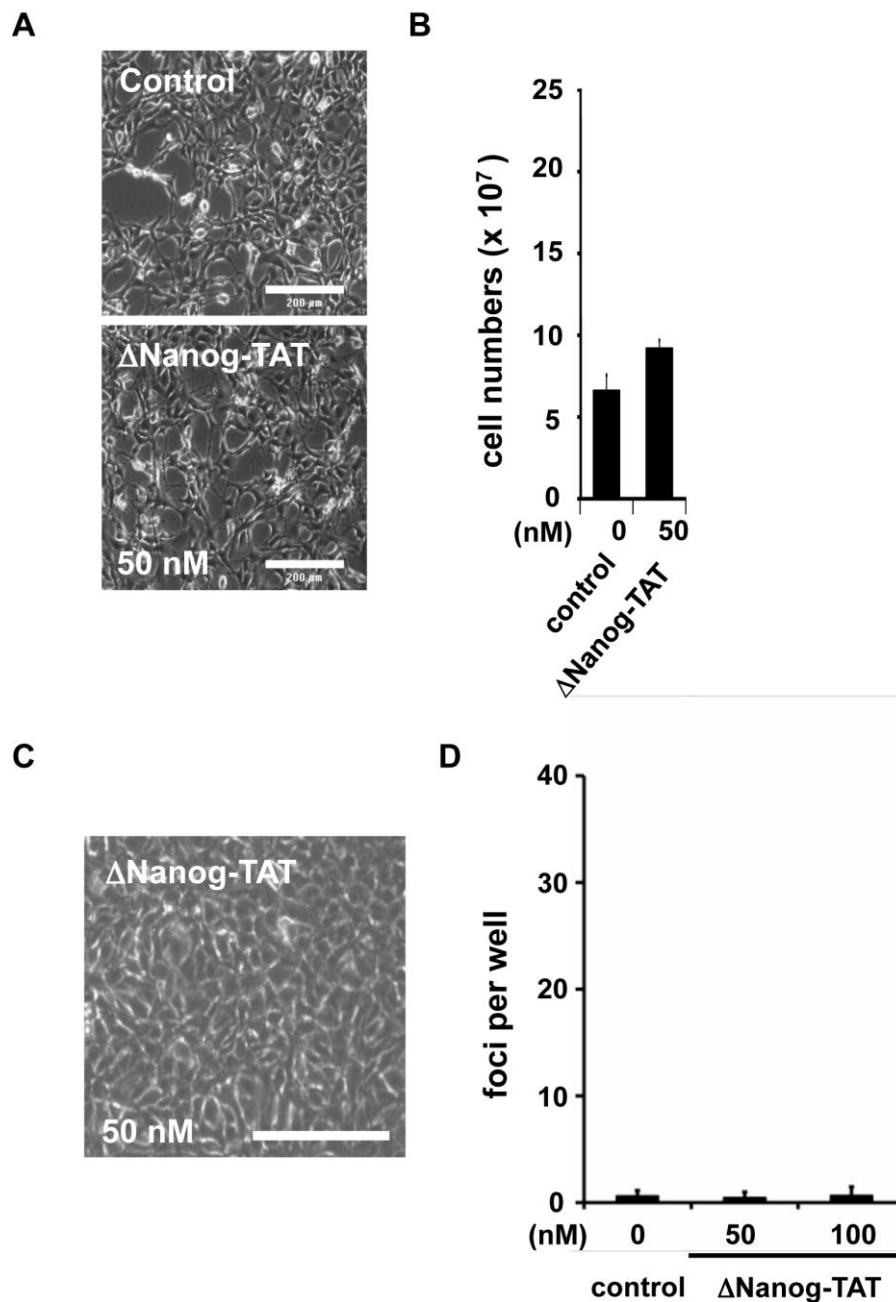

### Figure S1: $\Delta$ Nanog-TAT fails to enhance proliferation or generate cell-foci in NIH3T3 cells.

The deletion of the 65 aa long homeobox domain should attenuate binding of the deletion mutant to the DNA, i.e.  $\Delta$ Nanog-TAT should not exhibit functionality when compared to Nanog-TAT. (A,B) Effect of  $\Delta$ Nanog-TAT on the proliferation of NIH 3T3 cells. To investigate the effects of  $\Delta$ Nanog-TAT on the proliferation of NIH 3T3 cells,  $7.5 \times 10^4$  cells were plated in 3.5 cm<sup>2</sup> cell culture dishes with both control medium and 50 nM of  $\Delta$ Nanog-TAT recombinant protein for 10 days and were replated on day 3 and 7. Normal medium served as control. After 10 days, phase contrast images (A) were taken and the cumulative cell number was determined and shown in (B). Data are means  $\pm$  s.e.m. n = 3. Scale: 200  $\mu$ m. (C,D) NIH 3T3 cells could not form foci in the presence of  $\Delta$ Nanog-TAT. (C) Phase contrast images of NIH 3T3 cells cultivated with 50 nM  $\Delta$ Nanog-TAT for 10 days. (D) NIH 3T3 cells were cultivated with 50 and 100 nM concentrations of  $\Delta$ Nanog-TAT and numbers of foci per well were determined after 8 days; normal medium served as control. Data are means  $\pm$  s.e.m. n = 3.

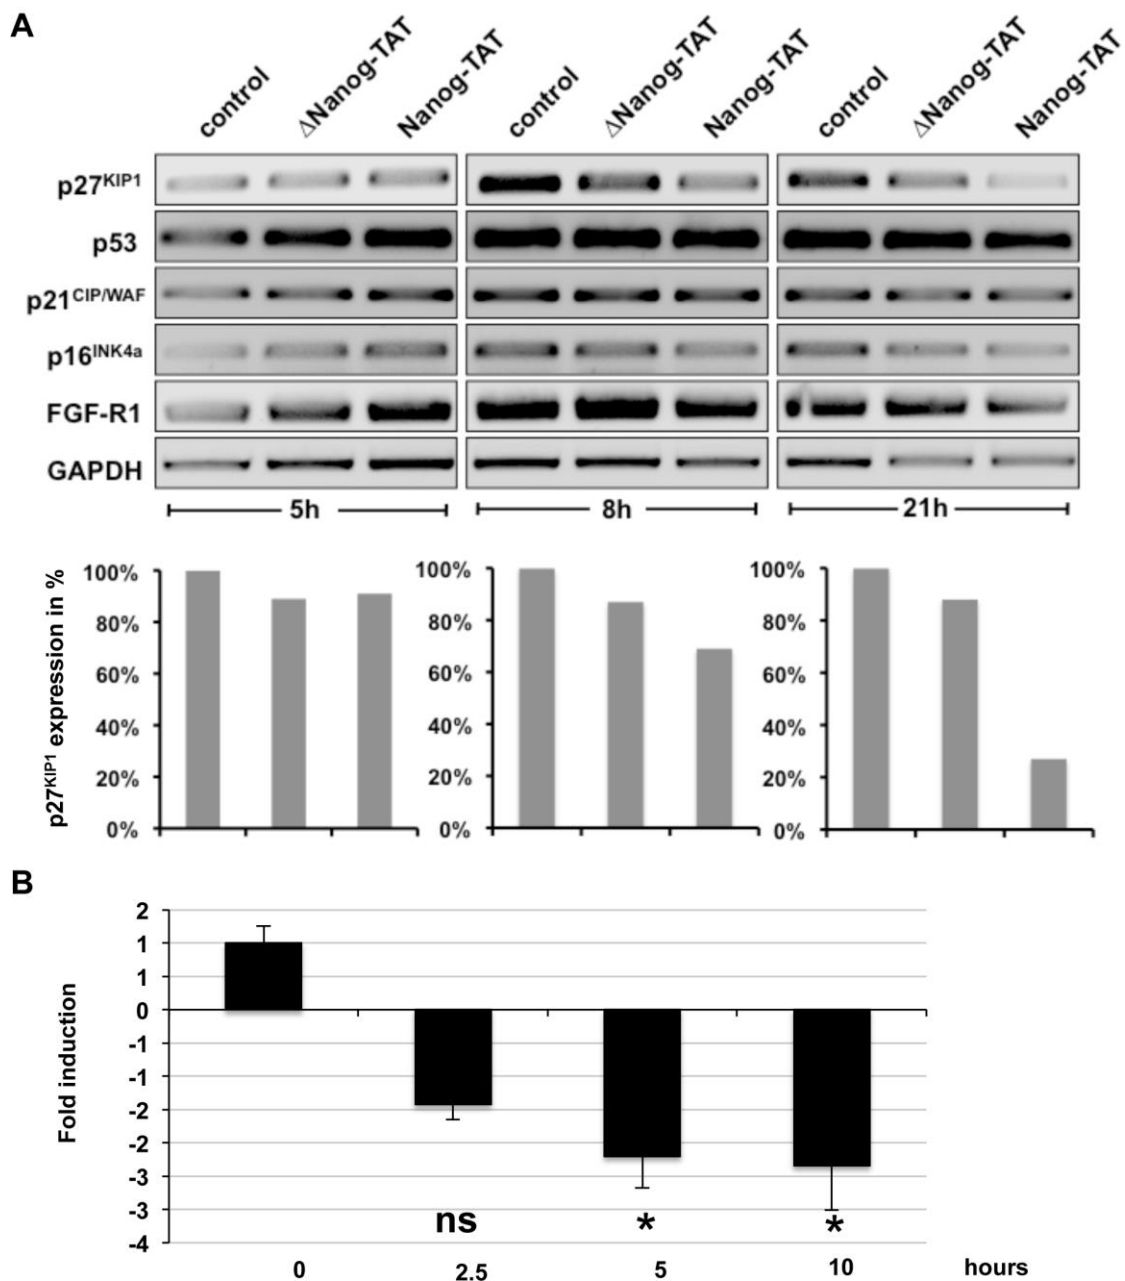

## Figure S2: Nanog-TAT delivery results in decreased expression levels of p27<sup>KIP1</sup>.

(A) MEFs were synchronized and cultivated with control medium,  $\Delta$ Nanog-TAT and Nanog-TAT, respectively. After 5, 8 and 21h the fibroblasts were harvested and the expression levels of different key molecules involved in proliferation as well as cell cycle regulation were assessed via RT-PCR. No change in transcription levels is apparent for p53, p21<sup>CIP/WAF</sup>, p16<sup>INK4a</sup> and FGF-receptor 1. Modulation of p27<sup>KIP1</sup> mRNA expression is apparent in Oct4-GiP MEFs upon cultivation with Nanog-TAT (top). The transcriptional expression level of p27<sup>KIP1</sup> was quantified densitometrically (bottom). Results are normalized to GAPDH. FGF-R1: FGF receptor 1; GAPDH: Glyceraldehyde 3-phosphate dehydrogenase. (B) Fold change expression levels of p27<sup>KIP1</sup> transcripts by qPCR. Oct4-GiP MEFs were synchronized and subsequently cultivated with control medium or 100 nM Nanog-TAT. After 0, 2.5, 5 and 10h, fibroblasts were harvested and the expression levels of p27<sup>KIP1</sup> were assessed via qPCR. Before harvesting fibroblasts, cells were washed with heparin to remove extracellularly bound Nanog-TAT protein. Expression levels of p27<sup>KIP1</sup> were down-regulated after Nanog-TAT treatment compared to untreated fibroblasts. p27<sup>KIP1</sup> gene expression levels are expressed as Log<sub>2</sub> fold changes based on Ct calculation using GAPDH as a house-keeping gene and non-transduced fibroblasts (0 hours) as a negative control. n = 2. Statistical analysis to calculate p-value was carried out using a two-tailed test; p-value: ns - not significant; \* p < 0.05.
